# Supplementary material for: A Systematic Review of the Current Evidence from Randomised Controlled Trials on the Impact of Medication Optimisation or Pharmacological Interventions on Quantitative Measures of Cognitive Function in Geriatric Patients
Source: Springer Nature journal article supplement (doi:10.1007/s40266-022-00980-9), 2022-10-26
Supplement: MOESM1 [file 23642750]

## A systematic review of the current evidence from randomised controlled trials on the impact of medication optimisation or pharmacological interventions on quantitative measures of cognitive function in geriatric patients

Farhad Pazan<sup>1</sup>, Mirko Petrovic<sup>2</sup>, Antonio Cherubini<sup>3</sup>, Alfonso J. Cruz-Jentoft<sup>4</sup>, Michael Denking<sup>5</sup>, Tischa J. M. van der Cammen<sup>6</sup>, Jennifer M. Stevenson<sup>7,8</sup>, Kinda Ibrahim<sup>9</sup>, Chakravarthi Rajkumar<sup>10</sup>, Marit Stordal Bakken<sup>11</sup>, Peter Crome<sup>12</sup>, Adalsteinn Guðmundsson<sup>13</sup>, Wilma Knol<sup>14</sup>, Birgitta M.G. Snijders<sup>15</sup>, Denis O'Mahony<sup>16</sup>, José Antonio Serra-Rexach<sup>17,18,19,20</sup>, George Soulis<sup>21</sup>, Rob J. van Marum<sup>22</sup>, Gijsbertus Zierveldt<sup>23,24</sup>, Alpana Mair<sup>25</sup>, Heinrich Burkhardt<sup>26</sup>, Agnieszka Neumann-Podczaska<sup>27</sup>, Katarzyna Wieczorowska-Tobis<sup>27,28</sup>, Marilia Andreia Fernandes<sup>29</sup>, Heidi Gruner<sup>29</sup>, Nathalie van der Velde<sup>30,31</sup>, and Martin Wehling<sup>1</sup>

<sup>1</sup>Clinical Pharmacology Mannheim, Faculty of Medicine Mannheim, Ruprecht-Karls-University of Heidelberg, Theodor-Kutzer-Ufer 1-3, 68167 Mannheim, Germany

<sup>2</sup>Section of Geriatrics, Department of Internal Medicine and Paediatrics, Ghent University, Ghent, Belgium

<sup>3</sup>Geriatrics, Accettazione geriatrica e Centro di ricerca per l'invecchiamento, IRCCS INRCA, Ancona, Italy

<sup>4</sup>Servicio de Geriátria. Hospital Universitario Ramón y Cajal (IRYCIS), Madrid, Spain

<sup>5</sup>Institute for Geriatric Research, University of Ulm and Geriatric Center Ulm, Agaplesion Bethesda Hospital, Ulm, Germany

<sup>6</sup>Faculty of Industrial Design Engineering, Delft University of Technology, Delft, Netherlands

<sup>7</sup>Institute of Pharmaceutical Science, King's College London, London, UK

<sup>8</sup>Pharmacy Department, Guy's and St. Thomas' NHS Foundation Trust, London, UK

<sup>9</sup>Academic Geriatric Medicine, Faculty of Medicine, Southampton University, Southampton, UK

<sup>10</sup>Geriatric & Stroke Medicine, Brighton and Sussex Medical School, Brighton, UK

<sup>11</sup>Department of Clinical Science, University of Bergen, Bergen, Norway

<sup>12</sup>Keele University, Newcastle under Lyme, UK

<sup>13</sup>University of Iceland, Geriatrics K4, Landspítali University, Reykjavík, Iceland

<sup>14</sup>Geriatrics, Department of Geriatric Medicine and Expertise Centre Pharmacotherapy in Old Persons, University Medical Center Utrecht, Utrecht University, Utrecht, The Netherlands

<sup>15</sup>Department of Geriatric Medicine, University Medical Center Utrecht, Utrecht, The Netherlands

<sup>16</sup>Department of Medicine, University College Cork, Cork University Hospital, Cork, Ireland

<sup>17</sup>Geriatric Department, Hospital General Universitario Gregorio Marañón, Madrid, Spain

<sup>18</sup>Instituto de Investigación Sanitaria Gregorio Marañón, Madrid, Spain

<sup>19</sup>Consorcio de Investigación Biomédica en Red: Fragilidad y Envejecimiento Saludable, CIBERFES, Madrid, Spain

<sup>20</sup>Medicine Department, Facultad de Medicina, Universidad Complutense de Madrid, Madrid, Spain

<sup>21</sup>Outpatient Geriatric Assessment Unit, Henry Dunant Hospital Center, Athens, Greece

<sup>22</sup>Department of General Medicine and Geriatric Medicine, Free University, Amsterdam, The Netherlands

<sup>23</sup>Section of Geriatric Medicine, Department of Internal Medicine, Erasmus MC, University Medical Center Rotterdam, Rotterdam, The Netherlands

<sup>24</sup>Department of Geriatric Medicine, Maasstad Hospital, Rotterdam, The Netherlands

<sup>25</sup>Effective Prescribing and Therapeutics, Scottish Government, Edinburgh, EH1 3DG UK

<sup>26</sup>IV. Medical Department, Geriatrics, University Hospital Mannheim, Heidelberg University, Mannheim, Germany

<sup>27</sup>Department of Palliative Medicine, Poznan University of Medical Sciences, Poznan, Poland

<sup>28</sup>Palliative Medicine Unit, University Hospital of Lord's Transfiguration, Poznan, Poland

<sup>29</sup>Department of Internal Medicine/ Geriatric Clinic, Hospital Curry Cabral, Centro Hospitalar Universitário de Lisboa Central, Lisbon, Portugal

<sup>30</sup>Department of Internal Medicine, Section of Geriatric Medicine, Amsterdam UMC, University of Amsterdam, Amsterdam, the Netherlands; <sup>31</sup>Amsterdam Public Health research institute, Amsterdam, The Netherlands

## Supplementary Material 1: PRISMA 2020 Checklist

| Section and Topic             | Item # | Checklist item                                                                                                                                                                                                                                                                                       | Location where item is reported |
|-------------------------------|--------|------------------------------------------------------------------------------------------------------------------------------------------------------------------------------------------------------------------------------------------------------------------------------------------------------|---------------------------------|
| <b>TITLE</b>                  |        |                                                                                                                                                                                                                                                                                                      |                                 |
| Title                         | 1      | Identify the report as a systematic review.                                                                                                                                                                                                                                                          | Page 1                          |
| <b>ABSTRACT</b>               |        |                                                                                                                                                                                                                                                                                                      |                                 |
| Abstract                      | 2      | See the PRISMA 2020 for Abstracts checklist.                                                                                                                                                                                                                                                         | Done                            |
| <b>INTRODUCTION</b>           |        |                                                                                                                                                                                                                                                                                                      |                                 |
| Rationale                     | 3      | Describe the rationale for the review in the context of existing knowledge.                                                                                                                                                                                                                          | Page 2                          |
| Objectives                    | 4      | Provide an explicit statement of the objective(s) or question(s) the review addresses.                                                                                                                                                                                                               | Page 2                          |
| <b>METHODS</b>                |        |                                                                                                                                                                                                                                                                                                      |                                 |
| Eligibility criteria          | 5      | Specify the inclusion and exclusion criteria for the review and how studies were grouped for the syntheses.                                                                                                                                                                                          | Page 3                          |
| Information sources           | 6      | Specify all databases, registers, websites, organisations, reference lists and other sources searched or consulted to identify studies. Specify the date when each source was last searched or consulted.                                                                                            | Page 3                          |
| Search strategy               | 7      | Present the full search strategies for all databases, registers and websites, including any filters and limits used.                                                                                                                                                                                 | Page 3-4 & Supplementary 3      |
| Selection process             | 8      | Specify the methods used to decide whether a study met the inclusion criteria of the review, including how many reviewers screened each record and each report retrieved, whether they worked independently, and if applicable, details of automation tools used in the process.                     | Page 3-4                        |
| Data collection process       | 9      | Specify the methods used to collect data from reports, including how many reviewers collected data from each report, whether they worked independently, any processes for obtaining or confirming data from study investigators, and if applicable, details of automation tools used in the process. | Page 3-4                        |
| Data items                    | 10a    | List and define all outcomes for which data were sought. Specify whether all results that were compatible with each outcome domain in each study were sought (e.g. for all measures, time points, analyses), and if not, the methods used to decide which results to collect.                        | Page 3-4                        |
|                               | 10b    | List and define all other variables for which data were sought (e.g. participant and intervention characteristics, funding sources). Describe any assumptions made about any missing or unclear information.                                                                                         | Page 3-4                        |
| Study risk of bias assessment | 11     | Specify the methods used to assess risk of bias in the included studies, including details of the tool(s) used, how many reviewers assessed each study and whether they worked independently, and if applicable, details of automation tools used in the process.                                    | Page 3-4                        |
| Effect measures               | 12     | Specify for each outcome the effect measure(s) (e.g. risk ratio, mean difference) used in the synthesis or presentation of results.                                                                                                                                                                  | Page 3-4                        |
| Synthesis methods             | 13a    | Describe the processes used to decide which studies were eligible for each synthesis (e.g. tabulating the study intervention characteristics and comparing against the planned groups for each synthesis (item #5)).                                                                                 | Page 3-4                        |
|                               | 13b    | Describe any methods required to prepare the data for presentation or synthesis, such as handling of missing summary statistics, or data conversions.                                                                                                                                                | Page 3-4                        |
|                               | 13c    | Describe any methods used to tabulate or visually display results of individual studies and syntheses.                                                                                                                                                                                               | Page 3-4                        |
|                               | 13d    | Describe any methods used to synthesize results and provide a rationale for the choice(s). If meta-analysis was performed, describe the model(s), method(s) to identify the presence and extent of statistical heterogeneity, and software package(s) used.                                          | Page 3-4                        |
|                               | 13e    | Describe any methods used to explore possible causes of heterogeneity among study results (e.g. subgroup analysis, meta-regression).                                                                                                                                                                 | na                              |
|                               | 13f    | Describe any sensitivity analyses conducted to assess robustness of the synthesized results.                                                                                                                                                                                                         | na                              |
| Reporting bias assessment     | 14     | Describe any methods used to assess risk of bias due to missing results in a synthesis (arising from reporting biases).                                                                                                                                                                              | Page 3-4                        |
| Certainty assessment          | 15     | Describe any methods used to assess certainty (or confidence) in the body of evidence for an outcome.                                                                                                                                                                                                | Page 3-4                        |
| <b>RESULTS</b>                |        |                                                                                                                                                                                                                                                                                                      |                                 |

| Section and Topic                              | Item # | Checklist item                                                                                                                                                                                                                                                                       | Location where item is reported           |
|------------------------------------------------|--------|--------------------------------------------------------------------------------------------------------------------------------------------------------------------------------------------------------------------------------------------------------------------------------------|-------------------------------------------|
| Study selection                                | 16a    | Describe the results of the search and selection process, from the number of records identified in the search to the number of studies included in the review, ideally using a flow diagram.                                                                                         | Page 4-6                                  |
|                                                | 16b    | Cite studies that might appear to meet the inclusion criteria, but which were excluded, and explain why they were excluded.                                                                                                                                                          | Page 7                                    |
| Study characteristics                          | 17     | Cite each included study and present its characteristics.                                                                                                                                                                                                                            | Page 7-9                                  |
| Risk of bias in studies                        | 18     | Present assessments of risk of bias for each included study.                                                                                                                                                                                                                         | Page 6-7                                  |
| Results of individual studies                  | 19     | For all outcomes, present, for each study: (a) summary statistics for each group (where appropriate) and (b) an effect estimate and its precision (e.g. confidence/credible interval), ideally using structured tables or plots.                                                     | Page 7-9 and supplementary 4              |
| Results of syntheses                           | 20a    | For each synthesis, briefly summarise the characteristics and risk of bias among contributing studies.                                                                                                                                                                               | Page 6-8                                  |
|                                                | 20b    | Present results of all statistical syntheses conducted. If meta-analysis was done, present for each the summary estimate and its precision (e.g. confidence/credible interval) and measures of statistical heterogeneity. If comparing groups, describe the direction of the effect. | na                                        |
|                                                | 20c    | Present results of all investigations of possible causes of heterogeneity among study results.                                                                                                                                                                                       | Page 7-9                                  |
|                                                | 20d    | Present results of all sensitivity analyses conducted to assess the robustness of the synthesized results                                                                                                                                                                            | Page 7-9                                  |
| Reporting biases                               | 21     | Present assessments of risk of bias due to missing results (arising from reporting biases) for each synthesis assessed.                                                                                                                                                              | Page 7-9                                  |
| Certainty of evidence                          | 22     | Present assessments of certainty (or confidence) in the body of evidence for each outcome assessed.                                                                                                                                                                                  | Page 7-9                                  |
| <b>DISCUSSION</b>                              |        |                                                                                                                                                                                                                                                                                      |                                           |
| Discussion                                     | 23a    | Provide a general interpretation of the results in the context of other evidence.                                                                                                                                                                                                    | Page 9-10                                 |
|                                                | 23b    | Discuss any limitations of the evidence included in the review.                                                                                                                                                                                                                      | Page 10-11                                |
|                                                | 23c    | Discuss any limitations of the review processes used.                                                                                                                                                                                                                                | Page 10-11                                |
|                                                | 23d    | Discuss implications of the results for practice, policy, and future research.                                                                                                                                                                                                       | Page 10-11                                |
| <b>OTHER INFORMATION</b>                       |        |                                                                                                                                                                                                                                                                                      |                                           |
| Registration and protocol                      | 24a    | Provide registration information for the review, including register name and registration number, or state that the review was not registered.                                                                                                                                       | Not registered                            |
|                                                | 24b    | Indicate where the review protocol can be accessed, or state that a protocol was not prepared.                                                                                                                                                                                       | Available on request                      |
|                                                | 24c    | Describe and explain any amendments to information provided at registration or in the protocol.                                                                                                                                                                                      | none                                      |
| Support                                        | 25     | Describe sources of financial or non-financial support for the review, and the role of the funders or sponsors in the review.                                                                                                                                                        | Page 11                                   |
| Competing interests                            | 26     | Declare any competing interests of review authors.                                                                                                                                                                                                                                   | See title page or end of final manuscript |
| Availability of data, code and other materials | 27     | Report which of the following are publicly available and where they can be found: template data collection forms; data extracted from included studies; data used for all analyses; analytic code; any other materials used in the review.                                           | na                                        |

From: Page MJ, McKenzie JE, Bossuyt PM, Boutron I, Hoffmann TC, Mulrow CD, et al. The PRISMA 2020 statement: an updated guideline for reporting systematic reviews. *BMJ* 2021;372:n71. doi: 10.1136/bmj.n71

For more information, visit: <http://www.prisma-statement.org/>

## Supplementary Material 2

### PICOs and instructions for systematic review of:

#### **Definitions of key terms:**

Cognitive function

Cognitive testing

Dementia

Pharmacological approaches to prevent/treat cognitive impairment

Inappropriate prescribing and medication optimization

Polypharmacy

#### **Aims:**

To review the most reliable evidence on the impact of medication optimization or pharmacological interventions on quantitative measures of cognitive function in geriatric patients derived from randomized controlled trials

#### **Patient population (P):**

Geriatric patients: Age limit  $\geq 80$  or patients aged 65 years or older with significant (typical for geriatrics) comorbidities (such as arterial hypertension, heart failure, myocardial infarction, acute coronary syndrome, stroke, atrial fibrillation, COPD, osteoporosis, type II diabetes mellitus, dementia, behavioral and psychological symptoms of dementia, depression, bipolar disorder, insomnia, chronic pain, epilepsy, Parkinson's disease, incontinence, anemia)

#### **Intervention/tool (I):**

Medication review/drug treatment optimization or pharmacological interventions

#### **Comparator (C):**

(n/a)

#### **Outcome (O):**

Changes in cognitive function

#### **Study design (S):**

Randomized controlled trials

#### **Search strategy:**

(Neuropsychological Tests [Mesh] OR "Stroop test"[Title/Abstract] OR "Trail Making Test"[Title/Abstract] OR "Wisconsin Card Sorting Test"[Title/Abstract] OR "Wechsler Memory Scale"[Title/Abstract] OR "NEECHAM Confusion Scale"[Title/Abstract] OR "DOSS"[Title/Abstract] OR "Consortium to Establish a Registry for Alzheimer's Disease Neuropsychological Battery"[Title/Abstract] OR "Delirium Detection Score"[Title/Abstract] OR "Memorial Delirium Assessment Scale"[Title/Abstract] OR "Short Portable Mental Status Questionnaire"[Title/Abstract] OR "MMSE"[Title/Abstract] OR "Brief Alzheimer screen"[Title/Abstract] OR "Timed Test of Money Counting"[Title/Abstract] OR "TTMC"[Title/Abstract] OR "Montreal Cognitive Assessment"[Title/Abstract] OR "MoCA"[Title/Abstract] OR "Clock draw test"[Title/Abstract] OR "Clock Drawing test"[Title/Abstract] OR "clock-drawing test"[Title/Abstract] OR "3-item recall"[Title/Abstract] OR "SLUMS"[Title/Abstract] OR "Mini-Cog"[Title/Abstract] OR "BOMC"[Title/Abstract] OR "Global Deterioration Scale"[Title/Abstract] OR "Confusion Assessment Method"[Title/Abstract] OR "Serial 7's"[Title/Abstract] OR "Reisberg-Scale"[Title/Abstract] OR "DemTect"[Title/Abstract] OR "The 4 'A's Test"[Title/Abstract] OR "4AT"[Title/Abstract] OR "Abbreviated Mental Test"[Title/Abstract] OR "AMT-10"[Title/Abstract] OR "AMT-4"[Title/Abstract] OR "bCAM"[Title/Abstract] OR "short-CAM"[Title/Abstract] OR "months of the year backwards"[Title/Abstract] OR "MOTYB"[Title/Abstract] OR "informant Single Question in Delirium"[Title/Abstract] OR "Informant single screening questions for delirium and dementia"[Title/Abstract] OR "SQiD"[Title/Abstract] OR "six-Item-Screener"[Title/Abstract] OR "Bamberger Demenz-Screening test"[Title/Abstract] OR "BDST"[Title/Abstract] OR "Severe Mini Mental State Examination"[Title/Abstract] OR "TFDD"[Title/Abstract] OR "Syndrom-Kurz-Test"[Title/Abstract] OR "Nursing Delirium Screening Scale"[Title/Abstract] OR "Delirium Observation Screening Scale"[Title/Abstract] OR "RUDAS"[Title/Abstract] OR "mini-Addenbrooke's Cognitive Examination"[Title/Abstract] OR "Nurses' Observation Scale of Cognitive Abilities"[Title/Abstract] OR "NOSCA"[Title/Abstract]) AND ("Polypharmacy"[Mesh] OR Polypharmacy[Title/Abstract] OR polytherapy[Title/Abstract] OR polymedication[Title/Abstract] OR hyperpolypharmacy[Title/Abstract] OR "medication appropriateness"[Title/Abstract] OR overprescribing[Title/Abstract] OR multidrug[Title/Abstract] OR "medication\*"[Title/Abstract] OR "multiple medications"[Title/Abstract] OR "multiple drug\*"[Title/Abstract] OR "beers criteria"[Title/Abstract] OR "STOPP AND START"[Title/Abstract] OR "FORTA"[Title/Abstract] OR "Medication Appropriateness Index"[Title/Abstract] OR "Potentially Inappropriate Medication List"[Mesh] OR "Potentially Inappropriate Medication"[Title/Abstract] OR "Inappropriate Prescribing"[Mesh] OR "Inappropriate Prescribing"[Title/Abstract] OR "Drug Therapy, Combination"[Mesh] OR "Pharmaceutical Preparations"[Mesh] OR "pharmacotherapy"[TW] OR "pharmacist review"[TW] OR "pharmacist intervention"[TW] OR "pharmacist assessment"[TW] OR "pharmacist management"[TW] OR

"pharmacist evaluation"[TW] OR "clinical assessment tool"[Title/Abstract] OR "decision support system"[Title/Abstract]) AND (random\* [Title/Abstract] OR RCT [Title/Abstract] OR controlled trial [Title/Abstract] OR "Randomized Controlled Trial" [Publication Type]) AND ("Homes for the aged" [MeSh] OR "frail elderly" [MeSh] OR "geriatric assessment"[MeSh] OR "Nursing homes" [MeSh] OR "Vulnerable Populations" [MeSh] OR "Activities of daily living"[MeSh] OR "Aged" [MeSh] OR "Aged, 80 and over"[MeSh] OR "Geriatrics"[MeSh] OR "Geriatric Nursing"[MeSh] OR "Geriatric Psychiatry"[MeSh] OR "Health Services for the Aged"[MeSh] OR "Aging" [MeSh] OR Homes for the aged[MeSh] OR "Alzheimer disease"[MeSh] OR "Cognition disorders"[MeSh] OR "Dementia"[MeSh] OR "cognitive frailty" [Title/Abstract] OR elder\* [Title/Abstract] OR elder\*[Title/Abstract] OR eldest[Title/Abstract] OR frail\*[Title/Abstract] OR geriatri\*[Title/Abstract] OR old age\*[Title/Abstract] OR oldest[Title/Abstract] OR old people[Title/Abstract] OR older[Title/Abstract] OR senior\*[Title/Abstract] OR older people[Title/Abstract] OR older subject\*[Title/Abstract] OR older patient\*[Title/Abstract] OR older age\*[Title/Abstract] OR older adult\*[Title/Abstract] OR older man[Title/Abstract] OR older men[Title/Abstract] OR older male\*[Title/Abstract] OR older woman[Title/Abstract] OR older women[Title/Abstract] OR older female\*[Title/Abstract] OR older population\*[Title/Abstract] OR older person\*[Title/Abstract] or "aged" [Title/Abstract] OR "aging"[Title/Abstract]OR "ageing"[Title/Abstract] OR "community-dwelling" [Title/Abstract] OR caregivers [Title/Abstract]OR caregiver[Title/Abstract] OR caregiver [Title/Abstract] OR senium[Title/Abstract] OR septuagenarian\*[Title/Abstract] OR octagenarian\*[Title/Abstract] OR octogenarian\*[Title/Abstract] OR nonagenarian\*[Title/Abstract] OR centarian\*[Title/Abstract] OR centenarian\*[Title/Abstract] OR supercentenarian\*[Title/Abstract])

**Filters:**

none

**Years considered:**

January 1, 1900 - May 19, 2021

### Supplementary Material 3

Search terms for MEDLINE

(Neuropsychological Tests [Mesh] OR "Stroop test"[Title/Abstract] OR "Trail Making Test"[Title/Abstract] OR "Wisconsin Card Sorting Test"[Title/Abstract] OR "Wechsler Memory Scale"[Title/Abstract] OR "NEECHAM Confusion Scale"[Title/Abstract] OR "DOSS"[Title/Abstract] OR "Consortium to Establish a Registry for Alzheimer's Disease Neuropsychological Battery"[Title/Abstract] OR "Delirium Detection Score"[Title/Abstract] OR "Memorial Delirium Assessment Scale"[Title/Abstract] OR "Short Portable Mental Status Questionnaire"[Title/Abstract] OR "MMSE"[Title/Abstract] OR "Brief Alzheimer screen"[Title/Abstract] OR "Timed Test of Money Counting"[Title/Abstract] OR "TTMC"[Title/Abstract] OR "Montreal Cognitive Assessment"[Title/Abstract] OR "MoCA"[Title/Abstract] OR "Clock draw test"[Title/Abstract] OR "Clock Drawing test"[Title/Abstract] OR "clock-drawing test"[Title/Abstract] OR "3-item recall"[Title/Abstract] OR "SLUMS"[Title/Abstract] OR "Mini-Cog"[Title/Abstract] OR "BOMC"[Title/Abstract] OR "Global Deterioration Scale"[Title/Abstract] OR "Confusion Assessment Method"[Title/Abstract] OR "Serial 7's"[Title/Abstract] OR "Reisberg-Scale"[Title/Abstract] OR "DemTect"[Title/Abstract] OR "The 4 'A's Test"[Title/Abstract] OR "4AT"[Title/Abstract] OR "Abbreviated Mental Test"[Title/Abstract] OR "AMT-10"[Title/Abstract] OR "AMT-4"[Title/Abstract] OR "bCAM"[Title/Abstract] OR "short-CAM"[Title/Abstract] OR "months of the year backwards"[Title/Abstract] OR "MOTYB"[Title/Abstract] OR "informant Single Question in Delirium"[Title/Abstract] OR "Informant single screening questions for delirium and dementia"[Title/Abstract] OR "SQiD"[Title/Abstract] OR "six-Item-Screener"[Title/Abstract] OR "Bamberger Demenz-Screening test"[Title/Abstract] OR "BDST"[Title/Abstract] OR "Severe Mini Mental State Examination"[Title/Abstract] OR "TFDD"[Title/Abstract] OR "Syndrom-Kurz-Test"[Title/Abstract] OR "Nursing Delirium Screening Scale"[Title/Abstract] OR "Delirium Observation Screening Scale"[Title/Abstract] OR "RUDAS"[Title/Abstract] OR "mini-Addenbrooke's Cognitive Examination"[Title/Abstract] OR "Nurses' Observation Scale of Cognitive Abilities"[Title/Abstract] OR "NOSCA"[Title/Abstract]) **AND** ("Polypharmacy"[Mesh] OR Polypharmacy[Title/Abstract] OR polytherapy[Title/Abstract] OR polymedication[Title/Abstract] OR hyperpolypharmacy[Title/Abstract] OR "medication appropriateness"[Title/Abstract] OR overprescribing[Title/Abstract] OR multidrug[Title/Abstract] OR "medication\*" [Title/Abstract] OR "multiple medications"[Title/Abstract] OR "multiple drug\*" [Title/Abstract] OR "beers criteria"[Title/Abstract] OR "STOPP AND START"[Title/Abstract] OR "FORTA"[Title/Abstract] OR "Medication Appropriateness Index"[Title/Abstract] OR "Potentially Inappropriate Medication List"[Mesh] OR "Potentially Inappropriate Medication"[Title/Abstract] OR "Inappropriate Prescribing"[Mesh] OR "Inappropriate Prescribing"[Title/Abstract] OR "Drug Therapy, Combination"[Mesh] OR "Pharmaceutical Preparations"[Mesh] OR "pharmacotherapy"[TW] OR "pharmacist review"[TW] OR "pharmacist intervention"[TW] OR "pharmacist assessment"[TW] OR "pharmacist management"[TW] OR "pharmacist evaluation"[TW] OR "clinical assessment tool"[Title/Abstract] OR "decision support system"[Title/Abstract]) **AND** (random\* [Title/Abstract] OR RCT [Title/Abstract] OR controlled trial [Title/Abstract] OR "Randomized Controlled Trial" [Publication Type]) **AND** ("Homes for the aged" [MeSh] OR "frail elderly" [MeSh] OR "geriatric assessment"[MeSh] OR "Nursing homes" [MeSh] OR "Vulnerable Populations" [MeSh] OR "Activities of daily living"[MeSh] OR "Aged" [MeSh] OR "Aged, 80 and over"[MeSh] OR "Geriatrics"[MeSh] OR "Geriatric Nursing"[MeSh] OR "Geriatric Psychiatry"[MeSh] OR "Health Services for the Aged"[MeSh] OR "Aging" [MeSh] OR Homes for the aged[MeSh] OR "Alzheimer disease"[MeSh] OR "Cognition disorders"[MeSh] OR "Dementia"[MeSh] OR "cognitive frailty" [Title/Abstract] OR elder\* [Title/Abstract] OR elder\*[Title/Abstract] OR eldest[Title/Abstract] OR frail\*[Title/Abstract] OR geriatri\*[Title/Abstract] OR old age\*[Title/Abstract] OR oldest[Title/Abstract] OR old

people[Title/Abstract] OR older[Title/Abstract] OR senior\*[Title/Abstract] OR older  
people[Title/Abstract] OR older subject\*[Title/Abstract] OR older patient\*[Title/Abstract] OR  
older age\*[Title/Abstract] OR older adult\*[Title/Abstract] OR older man[Title/Abstract] OR  
older men[Title/Abstract] OR older male\*[Title/Abstract] OR older woman[Title/Abstract] OR  
older women[Title/Abstract] OR older female\*[Title/Abstract] OR older  
population\*[Title/Abstract] OR older person\*[Title/Abstract] or "aged" [Title/Abstract] OR  
"aging"[Title/Abstract]OR "ageing"[Title/Abstract] OR "community-dwelling" [Title/Abstract]  
OR caregivers [Title/Abstract]OR caregiver[Title/Abstract] OR caregiver [Title/Abstract] OR  
senium[Title/Abstract] OR septuagenarian\*[Title/Abstract] OR octagenarian\*[Title/Abstract]  
OR octogenarian\*[Title/Abstract] OR nonagenarian\*[Title/Abstract] OR  
centarian\*[Title/Abstract] OR centenarian\*[Title/Abstract] OR  
supercentenarian\*[Title/Abstract])

## Supplementary Material 4

Summary of randomized controlled trials on the impact of drug optimization or pharmacological interventions on quantitative measures of cognitive capacity in geriatric patients.

| PMID/Author/Year                             | Type of population                                                                                                                 | Age mean (SD if provided) | Number of study participants | Women (%) | Outcome(s) relating to cognitive capacity                                                                                                                                                      | Intervention/duration                                                                                                                                                                                                             | Details on medication review/medication optimization                                                                                                                                                                                                                                                                                                                                                                                                                                                                                               | Positive outcome(s) relating to cognitive capacity                                                                                                                        | Jadad score * |
|----------------------------------------------|------------------------------------------------------------------------------------------------------------------------------------|---------------------------|------------------------------|-----------|------------------------------------------------------------------------------------------------------------------------------------------------------------------------------------------------|-----------------------------------------------------------------------------------------------------------------------------------------------------------------------------------------------------------------------------------|----------------------------------------------------------------------------------------------------------------------------------------------------------------------------------------------------------------------------------------------------------------------------------------------------------------------------------------------------------------------------------------------------------------------------------------------------------------------------------------------------------------------------------------------------|---------------------------------------------------------------------------------------------------------------------------------------------------------------------------|---------------|
| 11479391/ <a href="#">R. Camicioli</a> /2001 | Functionally independent patients with idiopathic Parkinson's disease (PD) who responded to L-Dopa and reported motor fluctuations | 66.7 (range: 57–75)       | 5                            | 40        | Cognitive testing: simple reaction time and choice reaction time Stroop test, covert orienting of spatial attention, and digit ordering. Self-assessed mood, anxiety, arousal or concentration | Patients were withdrawn from their usual antiparkinsonian medications. Afterwards, they were administered 0.2 mg/kg oral methylphenidate followed 30 minutes later by a 1-hour intravenous L-Dopa (2 mg/kg per h) infusion/3 days | Participants who reported benefit from L-Dopa/carbidopa and motor fluctuations were admitted and withdrawn from their usual antiparkinsonian medications. On 3 consecutive days in a randomized double-blinded fashion, they took 0.2 mg/kg oral methylphenidate or placebo followed 30 minutes later by a 1-hour intravenous L-Dopa (2 mg/kg per h) or placebo infusion. The three possible conditions (methylphenidate/placebo infusion, placebo/L-Dopa infusion, methylphenidate/L-Dopa infusion) were assigned in a random order by a research | Choice reaction time increased with L-Dopa treatment with or without concomitant methylphenidate, whereas methylphenidate alone improved choice reaction time (p = 0.049) | 2             |



|                                                    |                                                          |                          |     |    |                                                                       |                                                                                                                                                                                                                                     |                                                                                                                                                                                                                                                                                                                                                                                                                                                                                         |                                                                                                                                                                                                                                                                                                                        |   |
|----------------------------------------------------|----------------------------------------------------------|--------------------------|-----|----|-----------------------------------------------------------------------|-------------------------------------------------------------------------------------------------------------------------------------------------------------------------------------------------------------------------------------|-----------------------------------------------------------------------------------------------------------------------------------------------------------------------------------------------------------------------------------------------------------------------------------------------------------------------------------------------------------------------------------------------------------------------------------------------------------------------------------------|------------------------------------------------------------------------------------------------------------------------------------------------------------------------------------------------------------------------------------------------------------------------------------------------------------------------|---|
|                                                    |                                                          |                          |     |    |                                                                       |                                                                                                                                                                                                                                     | pharmacist who prepared the medication                                                                                                                                                                                                                                                                                                                                                                                                                                                  |                                                                                                                                                                                                                                                                                                                        |   |
| 17537289/ <a href="#">S. J. P. M. Eussen</a> /2007 | Population based, screened for mild cobalamin deficiency | 82 ± 5                   | 202 | 25 | Various tests including MMSE                                          | Eligible participants were randomized to receive 24 weeks of treatment in a parallel group design with daily oral doses of 1000mg cobalamin, a combination of 1000mg cobalamin and 400mg folic acid, or a placebo capsule/ 24 weeks | Individuals were randomized to receive daily oral capsules with either 1000 mg cobalamin, or 1000 mg cobalamin plus 400 mg folic acid, or placebo for 24 weeks. Concentrations of homocysteine, methionine, choline, betaine and dimethylglycine were assessed before and after 12 and 24 weeks of treatment. Cognitive function, including domains of attention, construction, sensorimotor speed, memory and executive function, was assessed before and after 24 weeks of treatment. | Participants with the largest increases in betaine concentrations showed a borderline significant (p = 0.07) higher memory performance compared to those without it. A tendency of participants with the largest increases in betaine concentrations to show the greatest improvement in memory function was observed. | 5 |
| 16330624/ <a href="#">M. G. Cole</a> /2006         | Hospitalized emergency department                        | 77.5 (6.7) vs 78.5 (6.6) | 157 | 69 | Hamilton Depression Rating Scale (HAMD), the Medical Outcomes 36-item | The intervention involved consultation and Treatment (guideline oriented) by a psychiatrist and                                                                                                                                     | Consultation and treatment by a psychiatrist and follow-up by a research nurse and the patient's family physician. Research assistants, blind to group allocation,                                                                                                                                                                                                                                                                                                                      | There were no clinically or statistically significant differences between the 2 groups in HAMD                                                                                                                                                                                                                         | 3 |

|                                               |                                                                                                |              |    |      |                                                                                                                                    |                                                                                                   |                                                                                                                                                                                     |                                                                                                                                                                                                                                                |   |
|-----------------------------------------------|------------------------------------------------------------------------------------------------|--------------|----|------|------------------------------------------------------------------------------------------------------------------------------------|---------------------------------------------------------------------------------------------------|-------------------------------------------------------------------------------------------------------------------------------------------------------------------------------------|------------------------------------------------------------------------------------------------------------------------------------------------------------------------------------------------------------------------------------------------|---|
|                                               |                                                                                                |              |    |      | Short Form (SF-36), the Diagnostic Interview Schedule (DIS), MMSE                                                                  | follow-up by a research nurse and the patient's family physician/<br>Follow-ups at 3 and 6 months | collected data from the patients                                                                                                                                                    | or SF-36 scores or any of the secondary outcome measures.                                                                                                                                                                                      |   |
| 17600848/ <a href="#">P.J. Connelly</a> /2008 | Outpatients with probable Alzheimer's Disease who were treated with a cholinesterase inhibitor | 76.27 (6.23) | 57 | 70.7 | Response according to the NICE criteria, MMSE, DSST, and IADL and Social Behaviour (SB) subscales of NOSGER                        | Capsules of 1mg of folic acid or placebo, daily administered/6 months                             | Concurrent treatment with a ChI and either folic acid or placebo. The study capsule and ChI were administered on the same day. The choice of ChI was left to the treating physician | Significant difference in the change of IADL and SB scores (folate + 1.50 (SD 5.32) vs placebo -2.29 (SD 6.16), p = 0.03)<br>16/23 subjects receiving folic acid were classified as NICE responders compared to 7/18 placebo subjects (p=0.05) | 5 |
| 16316485/ <a href="#">E. Savaskan</a> /2006   | Hospitalized patients with AD with behavioural symptoms                                        | 82.1 (7.02)  | 22 | 68.2 | NPI, CERAD neuropsychological test battery (which included the following tests: verbal fluency, modified Boston Naming Test, MMSE, | Quetiapine (25 – 200 mg) or haloperidol (0.5 – 4 mg) / 5 weeks                                    | The dosage was increased weekly: 25 mg for quetiapine and 0.5 mg for haloperidol. All patients received a ChI as co-medication (galantamine 2 x 8 mg)                               | Quetiapine and haloperidol both reduced delusions and agitation. Quetiapine improved the subscales depression                                                                                                                                  | 2 |

|                                         |                                                                            |            |      |     |                                                                                                                                                                                                                               |                                                                        |                                                                                                            |                                                                                                                                                                                                                                                                                   |   |
|-----------------------------------------|----------------------------------------------------------------------------|------------|------|-----|-------------------------------------------------------------------------------------------------------------------------------------------------------------------------------------------------------------------------------|------------------------------------------------------------------------|------------------------------------------------------------------------------------------------------------|-----------------------------------------------------------------------------------------------------------------------------------------------------------------------------------------------------------------------------------------------------------------------------------|---|
|                                         |                                                                            |            |      |     | constructional praxis and recall, word-list memory, word-list recognition and recall), NOSGER                                                                                                                                 |                                                                        |                                                                                                            | (p=0.031) and anxiety, and haloperidol increased aberrant motor activity. Both haloperidol and quetiapine improved word recall. Quetiapine had a significant positive effect on word-list memory (p=0.006).                                                                       |   |
| <a href="#">19770382/C.Legault/2009</a> | Postmenopausal women aged 65 and older at increased risk for breast cancer | 69.9 (4.2) | 1498 | 100 | A cognitive test battery: Global cognition screening, verbal knowledge, verbal fluency, memory (figural and verbal), attention and working memory, spatial ability, fine motor speed, evaluated 1 and 2-years post enrollment | Oral tamoxifen 20 mg/d or oral raloxifene 60 mg/d / maximum of 5 years | Tamoxifen 20 mg/d or raloxifene 60 mg/d in healthy postmenopausal women at increased risk of breast cancer | Global cognition, memory, visuospatial skills and verbal knowledge changed significant and independently of treatment. There were significant time effects across the three visits for some of the cognitive measures. Raloxifene was associated with higher scores compared with | 2 |

|                                                   |                                                                                                                 |            |     |      |                                                                                                                                                                                                                                                                                                                    |                                                                                                 |                                                                                                                                                            |                                                                                                             |   |
|---------------------------------------------------|-----------------------------------------------------------------------------------------------------------------|------------|-----|------|--------------------------------------------------------------------------------------------------------------------------------------------------------------------------------------------------------------------------------------------------------------------------------------------------------------------|-------------------------------------------------------------------------------------------------|------------------------------------------------------------------------------------------------------------------------------------------------------------|-------------------------------------------------------------------------------------------------------------|---|
|                                                   |                                                                                                                 |            |     |      |                                                                                                                                                                                                                                                                                                                    |                                                                                                 |                                                                                                                                                            | tamoxifen (p=0.04) on the List B interference trial (measure of verbal memory)                              |   |
| 20094015/ <a href="#">A. Valen-Sendstad</a> /2010 | Alzheimer's disease (AD) female outpatients aged 65–89 years, followed at a memory clinic in a general hospital | 65-89      | 55  | 100  | Dementia Rating Scale, Mini Mental State Examination (MMSE), Word List Memory, constructional praxis, Wechsler Adult Intelligence Scale–Digit Symbol-Coding, Trail Making Test, Part A; Modified Consortium to Establish a Registry for AD (CERAD) Boston Naming Test, evaluated 6 and 12-months post intervention | Oral estradiol 1mg/d and norethisterone 0.5 mg/d or placebo / 12 months                         | Randomly assigned to receive either 1-mg estradiol and 0.5-mg norethisterone or placebo once daily                                                         | No significant treatment effects between groups                                                             | 3 |
| 32710658/ <a href="#">K. S. Boockvar</a> /2020    | Acutely-ill long-term nursing home residents                                                                    | 81.7 (1.1) | 219 | 65.3 | Cognitive Performance Scale (CPS), Brief Interview of Mental Status (BIMS) during and 30 days after the end of                                                                                                                                                                                                     | Hospital Elder Life Program adapted to long-term care, a multi-component intervention including | Medication review completed on 54 of 114 (47%) patients of intervention group; were made recommendations to reduce or stop 22 drugs among 17 patients. The | The mean BIMS for the total sample increased from 8.8 at baseline to 9.9 at the end of the acute illness (p | 1 |

|                                             |                 |    |     |      |                                        |                                                                                                                                                                                                                                                                                                              |                                                                                                                                                                                                                                           |                                                                                                                        |   |
|---------------------------------------------|-----------------|----|-----|------|----------------------------------------|--------------------------------------------------------------------------------------------------------------------------------------------------------------------------------------------------------------------------------------------------------------------------------------------------------------|-------------------------------------------------------------------------------------------------------------------------------------------------------------------------------------------------------------------------------------------|------------------------------------------------------------------------------------------------------------------------|---|
|                                             |                 |    |     |      | the acute illness episode              | medication review and recommendations to primary care providers regarding discontinuing or reducing medications associated with delirium, using the American Geriatrics Society Beers guidelines, versus usual care / from the onset until one week post-treatment of an acute illness (maximum for 3 weeks) | most common drugs were histamine receptor 2 blockers (45%), drugs for Parkinson's disease (27%), benzodiazepines (18%), and anticholinergics (9%). Six patients had a medication reduced or discontinued as a result of a recommendation. | < .001) and the mean CPS decreased from 1.8 to 1.6 (not significant), but no positive effect on the intervention group |   |
| 26446153/ <a href="#">A. L. Juola</a> /2015 | Assisted living | 83 | 227 | 70.9 | Verbal fluency and clock drawing tests | The intervention was an educational intervention for nursing staff working in the intervention wards./two 4-h interactive training sessions based on constructive learning                                                                                                                                   | Educational contents: Polypharmacy; Potentially harmful drugs and their adverse effects (psychotropics, drugs with anticholinergic properties, Beers' Criteria drugs, NSAIDs, PPIs); Beneficial drugs for institutionalized older people, | None                                                                                                                   | 3 |

|                                                   |                                              |                                            |     |      |                                                                                                                                                                                              |                                                                                                                                    |                                                                                                                                                                                                                                                                                                               |                                                                                                                                        |   |
|---------------------------------------------------|----------------------------------------------|--------------------------------------------|-----|------|----------------------------------------------------------------------------------------------------------------------------------------------------------------------------------------------|------------------------------------------------------------------------------------------------------------------------------------|---------------------------------------------------------------------------------------------------------------------------------------------------------------------------------------------------------------------------------------------------------------------------------------------------------------|----------------------------------------------------------------------------------------------------------------------------------------|---|
|                                                   |                                              |                                            |     |      |                                                                                                                                                                                              | theory to recognize harmful medications and adverse drug events/Follow-up at 6 and 12 months                                       | common drug–drug interactions; the use of SFINX database; Drugs and renal failure; use of the Renbase database                                                                                                                                                                                                |                                                                                                                                        |   |
| 20224285/ <a href="#">U. Cornelli</a> /2010       | Patients suffering from probable AD          | 75 (4.2) intervention vs. 74 (4.9) control | 52  | 55.7 | MMSE II score and a three-point scale for sleeping                                                                                                                                           | One group was treated with antioxidant formula F at a dose of one ampoule/day in the morning immediately before breakfast/6 months | All patients were undergoing treatment with 5 mg of donepezil. One group was treated with antioxidant formula F at a dose of one ampoule/day in the morning immediately before breakfast, and the other group was treated with placebo (excipients plus 500 mg of fructose and flavouring) at one ampoule/day | None                                                                                                                                   | 2 |
| 29346524/ <a href="#">L. Romera-Liebana</a> /2018 | Community-dwelling adults aged older than 65 | 77.3                                       | 352 | 75.3 | Neuropsychological performance as measured by Short and Medium-Term Verbal Memory, Animal Naming Test, evocation of words beginning with one explicit letter, designation of famous people's | Four component intervention/12 weeks                                                                                               | Four component intervention: exercise training, intake of high protein nutritional shakes, memory training, and medication review (following STOPP criteria, with special focus on psychotropic drugs). Control group received standard care. Both groups were also                                           | Neurocognitive battery improved significantly in the intervention group as compared to the control group at 3- and 18-months follow-up | 2 |

|                                                |                                 |                                                |     |                                |                                                                                                                                                                                                                                                                                                                      |                                                                       |                                                                                                                                                           |                                                                                                                                                                                                                  |   |
|------------------------------------------------|---------------------------------|------------------------------------------------|-----|--------------------------------|----------------------------------------------------------------------------------------------------------------------------------------------------------------------------------------------------------------------------------------------------------------------------------------------------------------------|-----------------------------------------------------------------------|-----------------------------------------------------------------------------------------------------------------------------------------------------------|------------------------------------------------------------------------------------------------------------------------------------------------------------------------------------------------------------------|---|
|                                                |                                 |                                                |     |                                | names, Verbal designation of images and verbal abstraction of word pairs                                                                                                                                                                                                                                             |                                                                       | given counselling regarding dietary habits, lifestyle recommendations, and domestic hazards                                                               |                                                                                                                                                                                                                  |   |
| 29052691/ <a href="#">H. Wouters/2017</a>      | Nursing home residents          | 83.5                                           | 426 | 67.6                           | Mini-Mental State Examination (MMSE), Neuropsychiatric Inventory–Nursing Home Version (NPI-NH)                                                                                                                                                                                                                       | Single Multidisciplinary Multistep Medication Review (3MR)/45 minutes | Single Multidisciplinary Multistep Medication Review (3MR)/45 minutes on average. Standard care in the control group                                      | No difference between the intervention and control group                                                                                                                                                         | 3 |
| 26301603/ <a href="#">J. E. F. Moonen/2015</a> | Community-dwelling older people | intervention 81.1 (4.3) vs. control 81.5 (4.6) | 385 | Intervention 23 vs. control 30 | Overall cognition (compound score): computed if 5 of the following 6 tests were available: Stroop Color Word Test and Trail Making Test for executive functioning, 15-Word Verbal Learning Test and Visual Association Test for (immediate and delayed) verbal and picture memory and Letter-Digit Substitution Test | Discontinuation of antihypertensive medications/16 weeks              | Discontinuation of antihypertensive medications over a 6-week period after randomisation using a withdrawal algorithm with outcome assessment at 16 weeks | “In older persons with mild cognitive deficits, discontinuation of antihypertensive treatment did not improve cognitive, psychological, or general daily functioning at the 16-week follow-up.” (J. Moonen 2015) | 3 |

|  |  |  |  |  |                             |  |  |  |  |
|--|--|--|--|--|-----------------------------|--|--|--|--|
|  |  |  |  |  | for psychomotor speed; MMSE |  |  |  |  |
|--|--|--|--|--|-----------------------------|--|--|--|--|

\* The Jadad score which is a scale to assess the methodological quality or risk of bias of clinical trials is calculated by using a three-item questionnaire. Drop-outs/withdrawals, randomization, blinding and the quality of latter two items are assessed. The derived score ranges from zero (very poor) to five (rigorous). Jadad AR, Moore RA, Carroll D, et al. Assessing the quality of reports of randomized clinical trials: is blinding necessary? Control Clin Trials. 1996 Feb;17:1-12.

**Abbreviations:** AD: Alzheimer’s Disease, ChI : Cholinesterase Inhibitor, NICE : National Institute for Health and Care Excellence, MMSE : Mini-Mental State Examination, DSST : Digit Symbol Substitution Test, IADL : Instrumental Activities of Daily Living, SB : Social Behavior, NOSGER : Nurses Observation Scale for Geriatric Patients, CIT : citalopram, MPH : methylphenidate, HDRS : Hamilton Depression Rating Scale, WCST : Wisconsin Card Sorting Test, NPI : Neuropsychiatric Inventory, CERAD : Consortium to Establish a Registry for Alzheimer’s Disease, NA: not available/provided; DAT: The human dopamine transporter, VNTR: variable number of tandem repeats
